# Supplementary material
Source: PubMed Central journal article supplement (PMC8106232)
Supplement: NIHMS1691464-supplement-Supplementary_Table_2.pdf [file NIHMS1691464-supplement-Supplementary_Table_2.pdf]

**Supplementary Table 2.** List of primary antibodies.

| Targeted Protein | Species | Dilution | Catalog No. | Vendor                    |
|------------------|---------|----------|-------------|---------------------------|
| EZRIN            | Mouse   | 1:2000   | E8897       | Sigma-Aldrich             |
| E-CADHERIN       | Mouse   | 1:500    | 610181      | BD Biosciences            |
| Laminin          | Rabbit  | 1:250    | ab11575     | Abcam                     |
| N-CADHERIN       | Rabbit  | 1:100    | Ab12221     | Abcam                     |
| OCT4             | Mouse   | 1:200    | SC-5279     | Santa-Cruz Biotechnology  |
| OCT4             | Rabbit  | 1:500    | 2750S       | Cell Signaling Technology |
| NANOG            | Rabbit  | 1:500    | 4903S       | Cell Signaling Technology |
| SOX2             | Rabbit  | 1:500    | 09-0024     | Stemgent                  |
| ZO-1             | Mouse   | 1:1000   | 339100      | Thermo Fisher Scientific  |
| GM130            | Mouse   | 1:1000   | 610822      | BD Biosciences            |
| TFAP2A           | Mouse   | 1:100    | sc-12726    | Santa-Cruz Biotechnology  |
| TFAP2C           | Mouse   | 1:100    | sc-12762    | Santa-Cruz Biotechnology  |
| BRACHYURY        | Goat    | 1:100    | PA5-46984   | Thermo Fisher Scientific  |
| BRACHYURY        | Rabbit  | 1:200    | 81694S      | Cell Signaling Technology |
| GATA3            | Mouse   | 1:100    | MA1-028     | Thermo Fisher Scientific  |
| pSMAD1/5         | Rabbit  | 1:100    | 9516S       | Cell Signaling Technology |
| SOX17            | Goat    | 1:500    | AF1924      | R&D Systems               |
| CDX2             | Mouse   | 1:300    | MU392AUC    | Biogenex                  |
| EOMES            | Rabbit  | 1:200    | ab23345     | Abcam                     |
| BLIMP1           | Rabbit  | 1:200    | CS#9115S    | Cell Signaling Technology |
